# Supplementary material for: Evaluation of an eHealth intervention aiming to promote healthy food habits from infancy -the Norwegian randomized controlled trial Early Food for Future Health
Source: PubMed Central journal article supplement (PMC6318886; doi:10.1186/s12966-018-0763-4), 2019-01-03
Supplement: 12966_2018_763_MOESM1_ESM.pdf [file 12966_2018_763_MOESM1_ESM.pdf]

Table 1: CONSORT 2010 checklist of information to include when reporting a within-person randomised trial. For within-person trials, a group is the set of participants' body sites that was allocated a particular intervention.

| Section/Topic             | Item no. | Standard CONSORT Checklist item                                                                                                       | Extension for within-person trials                                            | Page no.       |
|---------------------------|----------|---------------------------------------------------------------------------------------------------------------------------------------|-------------------------------------------------------------------------------|----------------|
| <b>Title and abstract</b> |          |                                                                                                                                       |                                                                               |                |
|                           | 1a       | Identification as a randomised trial in the title                                                                                     | Identification as a within-person randomised trial in the title               | 1              |
|                           | 1b       | Structured summary of trial design, methods, results, and conclusions (for specific guidance see CONSORT for abstracts[3])            | Specify a within-person design and report all information outlined in table 2 | 2-3            |
| <b>Introduction</b>       |          |                                                                                                                                       |                                                                               |                |
| Background and objectives | 2a       | Scientific background and explanation of rationale                                                                                    |                                                                               | 4-5            |
|                           | 2b       | Specific objectives or hypotheses                                                                                                     |                                                                               | 4-5            |
| <b>Methods</b>            |          |                                                                                                                                       |                                                                               |                |
| Trial design              | 3a       | Description of trial design (such as parallel, factorial) including allocation ratio                                                  | Rationale for using a within-person design and identification of body sites   | 6-7            |
|                           | 3b       | Important changes to methods after trial commencement (such as eligibility criteria), with reasons                                    |                                                                               | not applicable |
| Participants              | 4a       | Eligibility criteria for participants                                                                                                 | Eligibility criteria for body sites                                           | 6              |
|                           | 4b       | Settings and locations where the data were collected                                                                                  |                                                                               | 6-7            |
| Interventions             | 5        | The interventions for each group with sufficient details to allow replication, including how and when they were actually administered | Whether interventions were given sequentially or concurrently                 | 6              |
| Outcomes                  | 6a       | Completely defined pre-specified primary and                                                                                          | Outcomes should be clearly defined as per-site or per-                        | 7-12           |

From: Pandis N, Chung B, Scherer RW, Elbourne D, Altman DG. CONSORT 2010 statement: extension checklist for reporting within person randomised trials. *BMJ*. 2017;357. This document is from an Open Access article distributed in accordance with the Creative Commons Attribution Non Commercial (CC BY-NC 4.0) license, which permits others to distribute, remix, adapt, build upon this work non-commercially, and license their derivative works on different terms, provided the original work is properly cited and the use is non-commercial. See: <http://creativecommons.org/licenses/by-nc/4.0/>.

| Section/Topic                    | Item no. | Standard CONSORT Checklist item                                                                                                                                                             | Extension for within-person trials                                                                                                                  | Page no.       |
|----------------------------------|----------|---------------------------------------------------------------------------------------------------------------------------------------------------------------------------------------------|-----------------------------------------------------------------------------------------------------------------------------------------------------|----------------|
|                                  |          | secondary outcome measures, including how and when they were assessed                                                                                                                       | person                                                                                                                                              |                |
|                                  | 6b       | Any changes to trial outcomes after the trial commenced, with reasons                                                                                                                       |                                                                                                                                                     | not applicable |
| Sample size                      | 7a       | How sample size was determined                                                                                                                                                              | Report the correlation between body sites                                                                                                           | 12-13          |
|                                  | 7b       | When applicable, explanation of any interim analyses and stopping guidelines                                                                                                                |                                                                                                                                                     |                |
| Randomisation:                   |          |                                                                                                                                                                                             |                                                                                                                                                     |                |
| Sequence generation              | 8a       | Method used to generate the random allocation sequence                                                                                                                                      |                                                                                                                                                     | 6-7            |
|                                  | 8b       | Type of randomisation; details of any restriction (such as blocking and block size)                                                                                                         | Methods used to determine the allocation sequence of body sites and treatments within an individual (e.g. how first site to be treated was decided) | 6-7            |
| Allocation concealment mechanism | 9        | Mechanism used to implement the random allocation sequence (such as sequentially numbered containers), describing any steps taken to conceal the sequence until interventions were assigned |                                                                                                                                                     | 6-7            |
| Implementation                   | 10       | Who generated the random allocation sequence, who enrolled participants, and who assigned participants to interventions                                                                     | Replaced by 10a                                                                                                                                     | 6-7            |
|                                  | 10a      |                                                                                                                                                                                             | Who generated the random allocation sequence, who enrolled participants, and who assigned body sites to interventions                               |                |
| Blinding (masking)               | 11a      | If done, who was blinded after assignment to interventions (for example, participants, care providers, those assessing outcomes) and how                                                    |                                                                                                                                                     | not appl.      |

From: Pandis N, Chung B, Scherer RW, Elbourne D, Altman DG. CONSORT 2010 statement: extension checklist for reporting within person randomised trials. *BMJ*. 2017;357. This document is from an Open Access article distributed in accordance with the Creative Commons Attribution Non Commercial (CC BY-NC 4.0) license, which permits others to distribute, remix, adapt, build upon this work non-commercially, and license their derivative works on different terms, provided the original work is properly cited and the use is non-commercial. See: <http://creativecommons.org/licenses/by-nc/4.0/>.

| Section/Topic                                        | Item no. | Standard CONSORT Checklist item                                                                                                                | Extension for within-person trials                                                           | Page no.                        |
|------------------------------------------------------|----------|------------------------------------------------------------------------------------------------------------------------------------------------|----------------------------------------------------------------------------------------------|---------------------------------|
|                                                      | 11b      | If relevant, description of the similarity of interventions                                                                                    |                                                                                              | not appl.                       |
| Statistical methods                                  | 12a      | Statistical methods used to compare groups for primary and secondary outcomes                                                                  | Statistical methods appropriate for within-person design                                     | 12-14                           |
|                                                      | 12b      | Methods for additional analyses, such as subgroup analyses and adjusted analyses                                                               |                                                                                              | 12-14                           |
| <b>Results</b>                                       |          |                                                                                                                                                |                                                                                              |                                 |
| Participant flow (a diagram is strongly recommended) | 13a      | For each group, the numbers of participants who were randomly assigned, received intended treatment, and were analysed for the primary outcome | Number of participants and number of body sites at each stage [See Figure 1]                 | 14-15<br>Fig 1;<br>(Flow chart) |
|                                                      | 13b      | For each group, losses and exclusions after randomisation, together with reasons                                                               | Number of participants and number of body sites lost or excluded at each stage, with reasons | 7,<br>14-15                     |
| Recruitment                                          | 14a      | Dates defining the periods of recruitment and follow-up                                                                                        |                                                                                              | 6                               |
|                                                      | 14b      | Why the trial ended or was stopped                                                                                                             |                                                                                              | not appl.                       |
| Baseline data                                        | 15       | A table showing baseline demographic and clinical characteristics for each group                                                               | Baseline characteristics for site and individual participants as applicable                  | 15-16<br>Table 1                |
| Numbers analysed                                     | 16       | For each group, number of participants (denominator) included in each analysis and whether the analysis was by original assigned groups        | Number of randomised body sites in each group included in each analysis                      | 18-23<br>Table 2-5              |
| Outcomes and                                         | 17a      | For each primary and secondary outcome, results for                                                                                            | Observed correlation between body sites for continuous                                       | 18-23                           |

From: Pandis N, Chung B, Scherer RW, Elbourne D, Altman DG. CONSORT 2010 statement: extension checklist for reporting within person randomised trials. *BMJ*. 2017;357. This document is from an Open Access article distributed in accordance with the Creative Commons Attribution Non Commercial (CC BY-NC 4.0) license, which permits others to distribute, remix, adapt, build upon this work non-commercially, and license their derivative works on different terms, provided the original work is properly cited and the use is non-commercial. See: <http://creativecommons.org/licenses/by-nc/4.0/>.

| Section/Topic            | Item no. | Standard CONSORT Checklist item                                                                                                           | Extension for within-person trials                                   | Page no.      |
|--------------------------|----------|-------------------------------------------------------------------------------------------------------------------------------------------|----------------------------------------------------------------------|---------------|
| estimation               |          | each group, and the estimated effect size and its precision (such as 95% confidence interval)                                             | outcomes and tabulation of paired results for binary outcomes        | Table 2-5     |
|                          | 17b      | For binary outcomes, presentation of both absolute and relative effect sizes is recommended                                               |                                                                      | 20<br>Table 3 |
| Ancillary analyses       | 18       | Results of any other analyses performed, including subgroup analyses and adjusted analyses, distinguishing pre-specified from exploratory |                                                                      | not appl.     |
| Harms                    | 19       | All important harms or unintended effects in each group (for specific guidance see CONSORT for harms)                                     | Harms or unintended effects reported by participant and by body site | not appl.     |
| <b>Discussion</b>        |          |                                                                                                                                           |                                                                      |               |
| Limitations              | 20       | Trial limitations, addressing sources of potential bias, imprecision, and, if relevant, multiplicity of analyses                          |                                                                      | 28-29         |
| Generalisability         | 21       | Generalisability (external validity, applicability) of the trial findings                                                                 |                                                                      | 28-29         |
| Interpretation           | 22       | Interpretation consistent with results, balancing benefits and harms, and considering other relevant evidence                             |                                                                      | 24-28         |
| <b>Other information</b> |          |                                                                                                                                           |                                                                      |               |
| Registration             | 23       | Registration number and name of trial registry                                                                                            |                                                                      | 3             |
| Protocol                 | 24       | Where the full trial protocol can be accessed, if available                                                                               |                                                                      | 5             |
| Funding                  | 25       | Sources of funding and other support (such as supply of drugs), role of funders                                                           |                                                                      | 31            |

From: Pandis N, Chung B, Scherer RW, Elbourne D, Altman DG. CONSORT 2010 statement: extension checklist for reporting within person randomised trials. *BMJ*. 2017;357. This document is from an Open Access article distributed in accordance with the Creative Commons Attribution Non Commercial (CC BY-NC 4.0) license, which permits others to distribute, remix, adapt, build upon this work non-commercially, and license their derivative works on different terms, provided the original work is properly cited and the use is non-commercial. See: <http://creativecommons.org/licenses/by-nc/4.0/>.
