# Supplementary material for: Evaluation of an eHealth intervention aiming to promote healthy food habits from infancy -the Norwegian randomized controlled trial Early Food for Future Health
Source: PubMed Central journal article supplement (PMC6318886; doi:10.1186/s12966-018-0763-4), 2019-01-03
Supplement: 12966_2018_763_MOESM3_ESM.pdf [file 12966_2018_763_MOESM3_ESM.pdf]

Supplemental Table1: Factor loadings for all items of the Child Eating Behavior Questionnaire (CEBQ) and Cronbach alpha scores for each factor structure

| Items                                                                     | Factors determined through factor analysis <sup>a</sup> |                              |                         |                       |                              |                          |                               |                       | Original scale |
|---------------------------------------------------------------------------|---------------------------------------------------------|------------------------------|-------------------------|-----------------------|------------------------------|--------------------------|-------------------------------|-----------------------|----------------|
|                                                                           | Food responsiveness<br>FR                               | Emotional over-eating<br>EOE | Enjoyment of food<br>EF | Desire to drink<br>DD | Satiety Responsiveness<br>SR | Slowness in eating<br>SE | Emotional under-eating<br>EUE | Food fussiness<br>FFF |                |
| My child is always asking for food                                        |                                                         |                              | .478                    |                       |                              |                          |                               |                       | FR             |
| If allowed to, my child would eat too much                                | <b>.595</b>                                             |                              | .346                    |                       |                              |                          |                               |                       | FR             |
| Given the choice, my child would eat most of the time                     | <b>.704</b>                                             |                              | .384                    |                       |                              |                          |                               |                       | FR             |
| Even if my child is full up s/he finds room to eat his/her favourite food | <b>.668</b>                                             |                              |                         |                       |                              |                          |                               |                       | FR             |
| If given the chance, my child would always have food in his/her mouth     | <b>.735</b>                                             |                              |                         |                       |                              |                          |                               |                       | FR             |
| My child eats more when worried                                           |                                                         | <b>.758</b>                  |                         |                       |                              |                          |                               |                       | EOE            |
| My child eats more when annoyed                                           |                                                         | <b>.802</b>                  |                         |                       |                              |                          |                               |                       | EOE            |
| My child eats more when anxious                                           |                                                         | <b>.827</b>                  |                         |                       |                              |                          |                               |                       | EOE            |
| My child eats more when s/he has nothing else to do                       | .552                                                    |                              |                         |                       |                              |                          |                               |                       | EOE            |
| My child loves food                                                       |                                                         |                              | <b>.722</b>             |                       |                              |                          |                               | -.321                 | EF             |
| My child is interested in food                                            |                                                         |                              | <b>.639</b>             |                       |                              |                          |                               | -.360                 | EF             |
| My child looks forward to mealtimes                                       |                                                         |                              | <b>.679</b>             |                       |                              |                          |                               |                       | EF             |

|                                                                           |  |  |             |             |             |             |             |       |     |
|---------------------------------------------------------------------------|--|--|-------------|-------------|-------------|-------------|-------------|-------|-----|
| My child enjoys eating                                                    |  |  | <b>.699</b> |             |             |             |             | -3.90 | EF  |
| My child is always asking for a drink                                     |  |  |             | <b>.635</b> |             |             |             |       | DD  |
| If given the chance, my child would drink continuously throughout the day |  |  |             | <b>.838</b> |             |             |             |       | DD  |
| If given the chance, my child would always be having a drink              |  |  |             | <b>.830</b> |             |             |             |       | DD  |
| My child has a big appetite (R)                                           |  |  | -691        |             |             |             |             |       | SR  |
| My child leaves food on his/her plate at the end of a meal                |  |  | -398        |             | <b>.609</b> |             |             |       | SR  |
| My child gets full before his/her meal is finished                        |  |  | -407        |             | <b>.607</b> |             |             |       | SR  |
| My child gets full up easily                                              |  |  | -529        |             | <b>.501</b> |             |             |       | SR  |
| My child cannot eat a meal if s/he has had a snack just before            |  |  |             |             | <b>.505</b> |             |             |       | SR  |
| My child finishes his/her meal quickly (R)                                |  |  |             |             |             | <b>.797</b> |             |       | SE  |
| My child eats slowly                                                      |  |  |             |             |             | <b>.753</b> |             |       | SE  |
| My child takes more than 30 minutes to finish a meal                      |  |  |             |             |             | <b>.771</b> |             |       | SE  |
| My child eats more and more slowly during the course of a meal            |  |  |             |             | .655        |             |             |       | SE  |
| My child eats less when angry                                             |  |  |             |             |             |             | <b>.782</b> |       | EUE |
| My child eats less when s/he is tired                                     |  |  |             |             | .436        |             | <b>.473</b> |       | EUE |
| My child eats less when upset                                             |  |  |             |             |             |             | <b>.794</b> |       | EUE |
| My child eats more when she is happy                                      |  |  |             |             |             |             | <b>.734</b> |       | EUE |

|                                                                         |            |                   |            |                   |            |                   |            |             |    |
|-------------------------------------------------------------------------|------------|-------------------|------------|-------------------|------------|-------------------|------------|-------------|----|
| My child refuses new foods at first                                     |            |                   |            |                   |            |                   |            | <b>.855</b> | FF |
| My child enjoys tasting new foods (R)                                   |            |                   |            |                   |            |                   |            | <b>.851</b> | FF |
| My child enjoys a wide variety of foods (R)                             |            |                   | -.354      |                   |            |                   |            | <b>.724</b> | FF |
| My child is difficult to please with meals                              |            |                   | -.435      |                   |            |                   | .359       | <b>.404</b> | FF |
| My child is interested in tasting food s/he hasn't tasted before (R)    |            |                   |            |                   |            |                   |            | <b>.829</b> | FF |
| My child decides that s/he doesn't like a food, even without tasting it |            |                   |            |                   |            |                   |            | <b>.699</b> | FF |
| Cronbach's alpha                                                        | .776       | .763 <sup>1</sup> | .858       | .810 <sup>2</sup> | .765       | .707 <sup>3</sup> | .736       | .883        |    |
| Mean score (SD)                                                         | 2.36 (.71) | 1.45 (.49)        | 4.04 (.62) | 2.17 (.87)        | 2.81 (.60) | 2.66 (.67)        | 3.28 (.80) | 1.87 (.69)  |    |

<sup>1</sup>Without item: My child eats more when s/he has nothing else to do

<sup>2</sup>Without item: My child is always asking for a drink

<sup>3</sup>Without item: My child eats more and more slowly during the course of a meal

<sup>a</sup> Principal component analysis (PCA) with Varimax normalized rotation were run on all the items. Questions with reversed scales were first reversely scored, and a factor loading cut-off of 0.3 was applied before running the factor analysis. The factor analysis of the original 35-items, 8-factor original CEBQ resulted in a 31-item 8-factor model in this study, with the same eight factors as in the original CEBQ. The 8-factor model accounted for 62% of the total variance. Cronbach's  $\alpha$  was computed for each of the eight subscales. To improve the internal reliability of the subscales, the item "My child eats more when s/he has nothing else to do" was excluded from the subscale *Emotional overeating*, the item "My child is always asking for a drink" was excluded from the subscale *Desire to drink* and the item "My child eats more and more slowly during the course of a meal" was excluded from the subscale *Slowness in eating*.
