# Supplementary material for: Evaluation of an eHealth intervention aiming to promote healthy food habits from infancy -the Norwegian randomized controlled trial Early Food for Future Health
Source: PubMed Central journal article supplement (PMC6318886; doi:10.1186/s12966-018-0763-4), 2019-01-03
Supplement: 12966_2018_763_MOESM4_ESM.pdf [file 12966_2018_763_MOESM4_ESM.pdf]

Supplemental Table 2: Factor loadings for all items of the Infant Feeding Questionnaire (IFQ) and Cronbach alpha scores for each factor structure (12 months)

| Items                                                                                                 | Factors determined through factor analysis                     |                                                 |                                        |                                                                           |                                                                         | Original scale |
|-------------------------------------------------------------------------------------------------------|----------------------------------------------------------------|-------------------------------------------------|----------------------------------------|---------------------------------------------------------------------------|-------------------------------------------------------------------------|----------------|
|                                                                                                       | Factor 1<br><i>Awareness of infant satiety and hunger cues</i> | Factor 2<br><i>Using food to calm fussiness</i> | Factor 3<br><i>Feeding on schedule</i> | Factor 4<br><i>Concern about infant undereating and being underweight</i> | Factor 5<br><i>Concern about infant overeating and being overweight</i> |                |
| <i>My child knows when she/he is hungry</i>                                                           | ,638                                                           |                                                 |                                        |                                                                           |                                                                         | Factor 1       |
| <i>My child knows when she/he is full</i>                                                             | ,580                                                           |                                                 |                                        |                                                                           |                                                                         | "              |
| <i>I know when my child is full</i>                                                                   | ,768                                                           |                                                 |                                        |                                                                           |                                                                         | "              |
| <i>I know when my child is hungry</i>                                                                 | ,706                                                           |                                                 |                                        |                                                                           |                                                                         | "              |
| <i>To make sure s/he don't get fussy, do you feed her/him even if you don't think s/he is hungry?</i> |                                                                | ,751                                            |                                        |                                                                           |                                                                         | Factor 2       |
| <i>Feeding my child is the best way to stop him/her being unsettled</i>                               |                                                                | ,825                                            |                                        |                                                                           |                                                                         | "              |
| <i>When your child gets upset, is feeding him/her the first thing you do?</i>                         |                                                                | ,686                                            |                                        |                                                                           |                                                                         | "              |
| <i>Do you only allow your child to feed at set times?</i>                                             |                                                                |                                                 | ,807                                   |                                                                           |                                                                         | Factor 3       |
| <i>Do you let your child feed whenever s/he wants to? (R)</i>                                         |                                                                |                                                 | ,724                                   |                                                                           |                                                                         | "              |
| <i>Do you worry that your child is not feeding enough?</i>                                            |                                                                |                                                 |                                        | ,836                                                                      |                                                                         | Factor 4       |
| <i>Is it a struggle to get your child to feed?</i>                                                    |                                                                |                                                 |                                        | ,825                                                                      |                                                                         | "              |

|                                                                             |             |             |             |             |             |          |
|-----------------------------------------------------------------------------|-------------|-------------|-------------|-------------|-------------|----------|
| <i>I am worried that my child will become underweight</i>                   |             |             |             | ,765        |             | “        |
| <i>If I don't encourage my child to feed, then s/he will not eat enough</i> |             |             |             | ,731        |             | “        |
| <i>Do you worry that your child is feeding too much?</i>                    |             |             |             |             | ,820        | Factor 5 |
| <i>I am worried that my child will become overweight</i>                    |             |             |             |             | ,777        | “        |
| <i>Do you get upset if your child feeds too much?</i>                       |             |             |             |             | ,806        | “        |
| <b>Cronbach's alpha</b>                                                     | ,64         | ,65         | ,46         | ,81         | ,72         |          |
| <b>Mean score (SD)</b>                                                      | 4,11 ± 0,60 | 2,12 ± 0,69 | 3,04 ± 0,77 | 1,87 ± 0,79 | 1,54 ± 0,65 |          |

Principal component analysis (PCA) with Varimax normalized rotation were run on all the items. Questions with reversed scales were first reversely scored, and a factor loading cut-off of 0.3 was applied before running the factor analysis. The factor analysis in this study resulted in the same five factors as in the modified IFQ, explaining 62% of the total variance (Additional file2: Table S2). Cronbach's  $\alpha$  was computed for each of the five subscales: *Feeding on a schedule* (2 items; e.g., Do you let your baby feed whenever s/he wants to?, Cronbach's  $\alpha=0.46$ ), *Awareness of hunger and satiety cues* (4 items; e.g., I know when my baby is hungry, Cronbach's  $\alpha=0.64$ ), *Concern about infant overeating and becoming overweight* (3 items; e.g., Do you worry that your baby is feeding too much?, Cronbach's  $\alpha=0.72$ ), *Concern about infant under-eating and becoming underweight* (4 items; e.g., I am worried that my baby will become underweight, Cronbach's  $\alpha=0.81$ ), and *Using food to calm* (3 items, e.g., Feeding my baby is the best way to stop him/her being unsettled, Cronbach's  $\alpha=0.65$ ).
