# Supplementary material for: Evaluation of an eHealth intervention aiming to promote healthy food habits from infancy -the Norwegian randomized controlled trial Early Food for Future Health
Source: PubMed Central journal article supplement (PMC6318886; doi:10.1186/s12966-018-0763-4), 2019-01-03
Supplement: 12966_2018_763_MOESM5_ESM.pdf [file 12966_2018_763_MOESM5_ESM.pdf]

**Additional file 5:**

Group comparison of baseline characteristics between participants who retained in the study and those who were lost to follow-up, and between the control and intervention group within the group of participants lost to follow-up.

| Variable                                                   | Follow-up vs. Lost to follow-up |                                       | Lost to follow-up; Control vs. Intervention group |                             |
|------------------------------------------------------------|---------------------------------|---------------------------------------|---------------------------------------------------|-----------------------------|
|                                                            | Completed 12 months Q<br>N=455  | Did not complete 12 months Q<br>N=260 | Control group<br>N=138                            | Intervention group<br>N=122 |
| <b>Mother</b>                                              |                                 |                                       |                                                   |                             |
| Age (years)                                                | 30.8 ± 4.2                      | 29.8 ± 4.4*                           | 29.7 ± 4.3                                        | 30.0 ± 4.6                  |
| Norwegian as native language                               | 93.0 (423)                      | 91.5 (238)                            | 92.8 (128)                                        | 90.2 (110)                  |
| First-time mother (for infant participating in the survey) | 58.5 (266)                      | 54.2 (141)                            | 55.1 (76)                                         | 53.3 (65)                   |
| Marital status                                             |                                 |                                       |                                                   |                             |
| Married                                                    | 40.7 (185)                      | 37.7 (98)                             | 36.2 (50)                                         | 39.3 (48)                   |
| Cohabitant                                                 | 56.9 (259)                      | 60.8 (158)                            | 61.6 (85)                                         | 59.8 (73)                   |
| Not married/cohabitant                                     | 2.4 (11)                        | 1.5 (4)                               | 2.2 (3)                                           | 0.8 (1)                     |
| Education (College/university degree)                      | 84.2 (378)                      | 76.9 (200)**                          | 74.6 (103)                                        | 79.5 (97)                   |
| Main activity (before pregnancy)                           |                                 |                                       |                                                   |                             |
| Working fulltime                                           | 81.6 (368)                      | 78.8 (204)                            | 78.8 (108)                                        | 78.7 (96)                   |
| Working part time                                          | 6.0 (27)                        | 8.1 (21)                              | 9.5 (13)                                          | 6.6 (8)                     |
| Student                                                    | 6.9 (31)                        | 8.1 (21)                              | 5.1 (7)                                           | 11.5 (14)                   |
| Not working                                                | 5.5 (25)                        | 5.0 (13)                              | 6.6 (9)                                           | 3.3 (4)                     |
| BMI (kg/m <sup>2</sup> )                                   | 24.9 ± 4.4                      | 24.9 ± 4.2                            | 24.5 ± 4.4                                        | 25.3 ± 4.0                  |
| Smoking                                                    | 4.0 (18)                        | 3.5 (9)                               | 2.2 (3)                                           | 4.9 (6)                     |
| Use of snus                                                | 4.8 (22)                        | 6.5 (17)                              | 5.1 (7)                                           | 8.2 (10)                    |
| <b>Infant</b>                                              |                                 |                                       |                                                   |                             |
| Gender (female)                                            | 49.5 (225)                      | 48.8 (127)                            | 47.8 (66)                                         | 50.0 (61)                   |
| Gestational age >38 weeks                                  | 91.9 (418)                      | 88.1 (229)                            | 84.8 (117)                                        | 91.8 (112)                  |
| Birth weight (g)                                           | 3589 ± 492                      | 3566 ± 492                            | 3522 ± 490                                        | 3616 ± 493                  |
| Exclusive breastfed first month                            | 66.8 (304)                      | 68.1 (177)                            | 71.0 (98)                                         | 64.8 (79)                   |
| Introduced to solid food before four months of age         | 5.1 (23)                        | 4.2 (11)                              | 2.2 (3)                                           | 6.6 (8)                     |

\* p=0.008, \*\*p=0.016
